# Supplementary material for: A Point Prevalence Survey of Healthcare-Associated Infections and Antimicrobial Use in Public Acute Care Hospitals in Crete, Greece
Source: MDPI journal article supplement (doi:10.3390/antibiotics11091258), 2022-09-16
Supplement: s1 [file s1]

Table S1. Characteristics of the participating hospitals.

| <b>Hospital code</b>                               | <b>701</b> | <b>702</b> | <b>703</b> | <b>704</b> | <b>705</b> | <b>706</b> | <b>707</b> | <b>708</b> | <b>Total</b> |
|----------------------------------------------------|------------|------------|------------|------------|------------|------------|------------|------------|--------------|
| <b>Hospital beds in total, n</b>                   | 147        | 440        | 75         | 27         | 75         | 220        | 502        | 771        | 2,257        |
| <b>ICU beds, n</b>                                 | 6          | 15         | 0          | 0          | 0          | 7          | 12         | 67         | 107          |
| <b>Patients included in PPS, n</b>                 | 63         | 233        | 28         | 12         | 33         | 104        | 272        | 443        | 1188         |
| <b>Admissions per year *, n</b>                    | 8192       | 36,525     | 3295       | 415        | 1,751      | 9,383      | 30,568     | 61,168     | 151,297      |
| <b>Alcoholic hand rub consumption, liters/year</b> | 3200       | 10,415     | 875        | 307        | 1,236      | 3,087      | 11,489     | 17,453     | 48,062       |
| <b>Full-time infection control nurses, n</b>       | 1          | 1          | 0          | 1          | 1          | 1          | 2          | 4          | 11           |
| <b>Full time infectious diseases physicians, n</b> | 0          | 0          | 0          | 0          | 0          | 1          | 0          | 4          | 5            |
| <b>Airborne infection isolation rooms, n</b>       | 0          | 0          | 0          | 0          | 0          | 6          | 0          | 7          | 13           |

ICU: intensive care unit; PPS: point-prevalence survey; \* Data refer to 2020 or 2021.

Table S2. Type of antimicrobials used.

| <b>Antimicrobial</b>                       | <b>Total</b> | <b>%</b> | <b>Treatment</b> | <b>%</b> | <b>SP</b> | <b>%</b> | <b>MP</b> | <b>%</b> | <b>Other</b> | <b>%</b> |
|--------------------------------------------|--------------|----------|------------------|----------|-----------|----------|-----------|----------|--------------|----------|
| Colistin oral                              | 1            | 0.1      | 1                | 0.1      | 0         | 0        | 0         | 0        | 0            | 0        |
| Rifaximin                                  | 1            | 0.1      | 0                | 0        | 0         | 0        | 1         | 0.9      | 0            | 0        |
| Vancomycin oral                            | 8            | 0.7      | 6                | 0.7      | 0         | 0        | 2         | 1.9      | 0            | 0        |
| Doxycycline                                | 15           | 1.3      | 12               | 1.5      | 0         | 0        | 3         | 2.8      | 0            | 0        |
| Tigecycline                                | 35           | 3.1      | 33               | 4.1      | 2         | 1.1      | 0         | 0        | 0            | 0        |
| Amoxicillin                                | 6            | 0.5      | 4                | 0.5      | 1         | 0.5      | 1         | 0.9      | 0            | 0        |
| Ampicillin                                 | 9            | 0.8      | 5                | 0.6      | 1         | 0.5      | 2         | 1.9      | 1            | 3.7      |
| Piperacillin                               | 11           | 1        | 10               | 1.2      | 0         | 0        | 1         | 0.9      | 0            | 0        |
| Benzylpenicillin                           | 1            | 0.1      | 1                | 0.1      | 0         | 0        | 0         | 0        | 0            | 0        |
| Cloxacillin                                | 3            | 0.3      | 3                | 0.4      | 0         | 0        | 0         | 0        | 0            | 0        |
| Amoxicillin and inhibitor                  | 7            | 0.6      | 4                | 0.5      | 2         | 1.1      | 1         | 0.9      | 0            | 0        |
| Ampicillin and inhibitor                   | 43           | 3.8      | 34               | 4.2      | 4         | 2.1      | 1         | 0.9      | 4            | 14.8     |
| Piperacillin and inhibitor                 | 106          | 9.4      | 81               | 10.1     | 8         | 4.2      | 11        | 10.2     | 6            | 22.2     |
| Sultamicillin                              | 3            | 0.3      | 1                | 0.1      | 1         | 0.5      | 1         | 0.9      | 0            | 0        |
| Second generation cephalosporins           | 118          | 10.5     | 25               | 3.1      | 80        | 42.1     | 10        | 9.3      | 3            | 11.1     |
| Cefaclor                                   | 1            | 0.1      | 0                | 0        | 0         | 0        | 1         | 0.9      | 0            | 0        |
| Ceforanide                                 | 15           | 1.3      | 1                | 0.1      | 12        | 6.3      | 0         | 0        | 2            | 7.4      |
| Cefoxitin                                  | 64           | 5.7      | 14               | 1.7      | 45        | 23.7     | 4         | 3.7      | 1            | 3.7      |
| Cefprozil                                  | 6            | 0.5      | 0                | 0        | 6         | 3.2      | 0         | 0        | 0            | 0        |
| Cefuroxime                                 | 32           | 2.8      | 10               | 1.2      | 17        | 8.9      | 5         | 4.6      | 0            | 0        |
| Third generation cephalosporins            | 124          | 11       | 110              | 13.7     | 9         | 4.7      | 5         | 4.6      | 0            | 0        |
| Cefixime                                   | 1            | 0.1      | 1                | 0.1      | 0         | 0        | 0         | 0        | 0            | 0        |
| Cefotaxime                                 | 9            | 0.8      | 9                | 1.1      | 0         | 0        | 0         | 0        | 0            | 0        |
| Ceftazidime                                | 11           | 1        | 7                | 0.9      | 2         | 1.1      | 2         | 1.9      | 0            | 0        |
| Ceftriaxone                                | 97           | 8.6      | 87               | 10.8     | 7         | 3.7      | 3         | 2.8      | 0            | 0        |
| Ceftazidime combinations                   | 6            | 0.5      | 6                | 0.7      | 0         | 0        | 0         | 0        | 0            | 0        |
| Fourth generation cephalosporin (cefepime) | 13           | 1.2      | 11               | 1.4      | 0         | 0        | 2         | 1.9      | 0            | 0        |
| Carbapenems                                | 81           | 7.2      | 72               | 9        | 2         | 1.1      | 5         | 4.6      | 2            | 7.4      |
| Ertapenem                                  | 1            | 0.1      | 1                | 0.1      | 0         | 0        | 0         | 0        | 0            | 0        |
| Imipenem and inhibitor                     | 2            | 0.2      | 2                | 0.2      | 0         | 0        | 0         | 0        | 0            | 0        |
| Meropenem                                  | 78           | 6.9      | 69               | 8.6      | 2         | 1.1      | 5         | 4.6      | 2            | 7.4      |
| Ceftaroline                                | 5            | 0.4      | 5                | 0.6      | 0         | 0        | 0         | 0        | 0            | 0        |
| Ceftolozane and inhibitor                  | 2            | 0.2      | 2                | 0.2      | 0         | 0        | 0         | 0        | 0            | 0        |
| Sulfamethoxazole and trimethoprim          | 20           | 1.8      | 5                | 0.6      | 0         | 0        | 15        | 13.9     | 0            | 0        |
| Sulfametrole and trimethoprim              | 1            | 0.1      | 0                | 0        | 0         | 0        | 1         | 0.9      | 0            | 0        |
| Macrolides                                 | 28           | 2.5      | 25               | 3.1      | 1         | 0.5      | 1         | 0.9      | 1            | 3.7      |
| Azithromycin                               | 24           | 2.1      | 22               | 2.7      | 0         | 0        | 1         | 0.9      | 1            | 3.7      |
| Clarithromycin                             | 3            | 0.3      | 2                | 0.2      | 1         | 0.5      | 0         | 0        | 0            | 0        |
| Erythromycin                               | 1            | 0.1      | 1                | 0.1      | 0         | 0        | 0         | 0        | 0            | 0        |
| Clindamycin                                | 35           | 3.1      | 24               | 3        | 10        | 5.3      | 1         | 0.9      | 0            | 0        |
| Aminoglycosides                            | 25           | 2.2      | 16               | 2        | 6         | 3.2      | 1         | 0.9      | 2            | 7.4      |
| Amikacin                                   | 18           | 1.6      | 11               | 1.4      | 6         | 3.2      | 1         | 0.9      | 1            | 3.7      |
| Gentamicin                                 | 7            | 0.6      | 5                | 0.6      | 0         | 0        | 1         | 0.9      | 1            | 3.7      |
| Fluoroquinolones                           | 127          | 11.3     | 96               | 12       | 17        | 8.9      | 13        | 12       | 1            | 3.7      |
| Ciprofloxacin                              | 58           | 5.1      | 36               | 4.5      | 16        | 8.4      | 6         | 5.6      | 0            | 0        |

|                           |      |     |     |     |     |      |     |     |    |     |
|---------------------------|------|-----|-----|-----|-----|------|-----|-----|----|-----|
| Levofloxacin              | 40   | 3.5 | 32  | 4   | 1   | 0.5  | 6   | 5.6 | 1  | 3.7 |
| Moxifloxacin              | 29   | 2.6 | 28  | 3.5 | 0   | 0    | 1   | 0.9 | 0  | 0   |
| Glycopeptides             | 99   | 8.8 | 59  | 7.4 | 29  | 15.3 | 10  | 9.3 | 1  | 3.7 |
| Teicoplanin               | 56   | 5   | 28  | 3.5 | 22  | 11.6 | 5   | 4.6 | 1  | 3.7 |
| Vancomycin parenteral     | 43   | 3.8 | 31  | 3.7 | 7   | 3.7  | 5   | 4.6 | 0  | 0   |
| Colistin                  | 29   | 2.6 | 28  | 3.5 | 0   | 0    | 0   | 0   | 1  | 3.7 |
| Metronidazole parenteral  | 68   | 6   | 49  | 6.1 | 13  | 6.8  | 6   | 5.6 | 0  | 0   |
| Daptomycin                | 21   | 1.9 | 19  | 2.4 | 0   | 0    | 2   | 1.9 | 0  | 0   |
| Linezolid                 | 23   | 2   | 21  | 2.6 | 0   | 0    | 1   | 0.9 | 1  | 3.7 |
| Amphotericin B parenteral | 4    | 0.4 | 1   | 0.1 | 0   | 0    | 3   | 2.8 | 0  | 0   |
| Miconazole                | 1    | 0.1 | 1   | 0.1 | 0   | 0    | 0   | 0   | 0  | 0   |
| Triazole derivatives      | 20   | 1.8 | 13  | 1.6 | 2   | 1.1  | 4   | 3.7 | 1  | 3.7 |
| Fluconazole               | 14   | 1.2 | 10  | 1.2 | 2   | 1.1  | 2   | 1.9 | 0  | 0   |
| Posaconazole              | 1    | 0.1 | 0   | 0   | 0   | 0    | 1   | 0.9 | 0  | 0   |
| Voriconazole              | 2    | 0.2 | 2   | 0.2 | 0   | 0    | 0   | 0   | 0  | 0   |
| Isavuconazole             | 3    | 0.3 | 1   | 0.1 | 0   | 0    | 1   | 0.9 | 1  | 3.7 |
| Anidulafungin             | 6    | 0.5 | 6   | 0.7 | 0   | 0    | 0   | 0   | 0  | 0   |
| Micafungin                | 16   | 1.4 | 12  | 1.5 | 0   | 0    | 3   | 2.8 | 1  | 3.7 |
| Rifampicin                | 5    | 0.4 | 3   | 0.4 | 0   | 0    | 1   | 0.9 | 1  | 3.7 |
| Metronidazole oral/rectal | 7    | 0.6 | 4   | 0.5 | 2   | 1.1  | 0   | 0   | 1  | 3.7 |
| Total antimicrobials      | 1127 | 100 | 802 | 100 | 190 | 100  | 108 | 100 | 27 | 100 |

MP: medical prophylaxis; SP: surgical prophylaxis
